## **Disrupting hierarchical control of nitrogen fixation enables carbon-dependent regulation of ammonia excretion in soil diazotrophs**

Marcelo Bueno Batista<sup>a\*</sup>, Paul Brett<sup>b</sup>, Corinne Appia-Ayme<sup>a</sup>, Yi-Ping Wang<sup>c\*</sup>, Ray Dixon<sup>a\*</sup>

<sup>a</sup>Department of Molecular Microbiology, John Innes Centre, Norwich, NR4 7UH, United Kingdom

<sup>b</sup>Department of Metabolic Biology, John Innes Centre, Norwich, NR4 7UH, United Kingdom

<sup>c</sup>State Key Laboratory of Protein and Plant Gene Research, School of Life Sciences & School of Advanced Agricultural Sciences, Peking University, Beijing 100871, China

\*Correspondence to: [marcelo.batista@jic.ac.uk](mailto:marcelo.batista@jic.ac.uk) (M.B.B); [wangyp@pku.edu.cn](mailto:wangyp@pku.edu.cn) (Y-P.W); [ray.dixon@jic.ac.uk](mailto:ray.dixon@jic.ac.uk) (R.D.)

## 1 **Abstract**

2           The energetic requirements for biological nitrogen fixation necessitate stringent  
3 regulation of this process in response to diverse environmental constraints. To ensure  
4 that the nitrogen fixation machinery is expressed only under appropriate physiological  
5 conditions, the dedicated NifL-NifA regulatory system, prevalent in Proteobacteria,  
6 plays a crucial role in integrating signals of the oxygen, carbon and nitrogen status to  
7 control transcription of nitrogen fixation (*nif*) genes. Greater understanding of the  
8 intricate molecular mechanisms driving transcriptional control of *nif* genes may provide  
9 a blueprint for engineering diazotrophs that associate with cereals. In this study, we  
10 investigated the properties of a single amino acid substitution in NifA, (NifA-E356K)  
11 which disrupts the hierarchy of *nif* regulation in response to carbon and nitrogen status  
12 in *Azotobacter vinelandii*. The NifA-E356K substitution enabled overexpression of  
13 nitrogenase in the presence of excess fixed nitrogen and release of ammonia outside  
14 the cell. However, both of these properties were conditional upon the nature of the  
15 carbon source. Our studies reveal that the uncoupling of nitrogen fixation from its  
16 assimilation is likely to result from feedback regulation of glutamine synthetase,  
17 allowing surplus fixed nitrogen to be excreted. Reciprocal substitutions in NifA from  
18 other Proteobacteria yielded similar properties to the *A. vinelandii* counterpart,  
19 suggesting that this variant protein may facilitate engineering of carbon source-  
20 dependent ammonia excretion amongst diverse members of this family.

21

## 22 **Significance**

23           The NifL-NifA regulatory system provides dedicated signal transduction  
24 machinery to regulate nitrogen fixation in diverse Proteobacteria. Understanding how  
25 the balance of nitrogen and carbon resources is signalled via NifL-NifA for precise

26 control of nitrogen fixation may lead to broadly applicable translational outputs. Here,  
27 we characterize a NifA variant that bypasses nitrogen regulation but is still dependent  
28 on the carbon status to enable ammonia excretion in soil diazotrophs. Disruption of  
29 the regulatory hierarchy in response to nitrogen and carbon suggests how the  
30 integration of environmental stimuli could be harnessed to engineer conditional  
31 release of fixed nitrogen for the benefit of cereal crops.

32

### 33 **Introduction**

34 Biological nitrogen fixation requires diversion of reducing equivalents and ATP  
35 derived from carbon metabolism to support the high energetic demands of the enzyme  
36 nitrogenase, which converts dinitrogen to ammonia. Tight regulatory control provides  
37 the means to balance energy metabolism with nitrogen fixation and ammonia  
38 assimilation so that fixed nitrogen is not limiting under diazotrophic growth conditions.  
39 Achieving an appropriate balance between carbon and nitrogen metabolism is  
40 particularly important for diazotrophic bacteria in order to meet the energetic cost of  
41 nitrogen fixation, while thriving in competitive environments. While many studies on  
42 the regulation of nitrogen fixation have focused on intricate signalling mechanisms  
43 responding to the presence of oxygen and fixed nitrogen (1–3), regulation in response  
44 to the carbon status has not been extensively studied, despite its significance for the  
45 energetics of diazotrophy and the interplay required to balance the carbon : nitrogen  
46 ratio.

47 The nitrogen fixation specific, NifL-NifA, regulatory system provides a very  
48 sophisticated signal transduction complex for integration and transmission of various  
49 environmental cues to the transcriptional apparatus in *Azotobacter vinelandii* to  
50 regulate biosynthesis and expression of nitrogenase (reviewed in 8, 9). The anti-

51 activator NifL is a multidomain protein carrying an N-terminal PAS domain (PAS1) that  
52 senses the redox status via a FAD co-factor (6, 7). A second PAS domain (PAS2)  
53 appears to play a structural role in relaying the redox changes perceived by the PAS1  
54 domain to the central (H) and C-terminal (GHKL) domains of NifL (8, 9). The latter is  
55 responsible for ADP binding (10, 11) and is probably the site of interaction for the GlnK  
56 signal transduction protein, allowing integration of the nitrogen input into NifL-NifA  
57 regulation (12, 13). The protein partner of NifL, the prokaryotic enhancer binding  
58 protein NifA, which activates *nif* transcription, is comprised of an N-terminal regulatory  
59 domain (GAF), a central AAA+ sigma-54 activation domain and a C-terminal DNA  
60 binding domain. The regulatory GAF domain of *A. vinelandii* NifA binds 2-oxoglutarate  
61 (14), a TCA cycle intermediate at the interface of carbon and nitrogen metabolism  
62 (15). NifA can only escape inhibition by NifL, when the GAF domain is saturated with  
63 2-oxoglutarate, thus potentially providing a mechanism for the NifL-NifA system to  
64 respond to the carbon status.

65         Understanding how the NifL-NifA system integrates diverse regulatory inputs  
66 may allow new strategies for engineering diazotrophs with enhanced ability to fix  
67 nitrogen and release ammonia to benefit crop nutrition. Ammonia excretion can be  
68 achieved in *A. vinelandii* by engineering constitutive expression of genes required for  
69 nitrogenase biosynthesis through inactivation of *nifL* (16–19). However, in the absence  
70 of active NifL, all the regulatory signal inputs that control NifA activity are removed,  
71 and as consequence, the resulting bacterial strain may be severely disadvantaged in  
72 the environment and even unstable under laboratory conditions as already reported  
73 (17, 19). Isolation of insertion mutants in *nifL* appears to be conditional upon second  
74 site mutations that may alter the level of *nif* gene expression. One such suppressor  
75 was identified in a promoter-like sequence upstream of *nifA*, presumably leading to a

76 permissive reduction in *nifA* transcript levels (19). A full deletion of *nifL* has also been  
77 reported (18), but it is unclear if second site mutations occurred during its isolation.

78 One approach to potentially minimize the energetic burden associated with  
79 constitutive expression of nitrogenase is to ensure that regulatory control of NifA  
80 activity is maintained in energy-limiting environments. Random mutagenesis of *nifA*  
81 followed by screening the activity of the *A. vinelandii* NifL-NifA system in *E. coli*  
82 identified various NifA variants able to escape regulation by NifL under nitrogen excess  
83 conditions (20). One of these mutations, resulting in a charge-change substitution,  
84 E356K, located in the central catalytic domain of NifA, (hereafter named NifA-E356K),  
85 was found to require binding of 2-oxoglutarate to the GAF domain to escape NifL  
86 repression in response to excess fixed nitrogen (14, 21).

87 In this study we demonstrate that both expression and activity of nitrogenase  
88 are insensitive to the nitrogen status when the *nifA-E356K* mutation is introduced into  
89 *A. vinelandii*, resulting in excretion of ammonia at millimolar levels during exponential  
90 growth, a phenomenon correlated with feedback regulation of glutamine synthetase  
91 when nitrogenase is constitutively active. However, unregulated expression of *nif*  
92 genes and ammonia excretion by the *nifA-E356K* mutant is conditional on the nature  
93 of the carbon source indicating dependency on carbon status signalling and  
94 supporting previous biochemical observations that this NifA-E356K variant is  
95 dependent on the levels of 2-oxoglutarate to escape nitrogen regulation by NifL *in vitro*  
96 (21). Finally, we demonstrate that reciprocal substitutions in NifA proteins of other  
97 Proteobacteria lead to similar regulatory phenotypes when assayed in *E. coli* as a  
98 chassis and also when the substitution is engineered in the endophytic diazotroph  
99 *Pseudomonas stutzeri* A1501 (22, 23). In principle, this single amino acid substitution  
100 in NifA (E356K) provides a regulatory switch capable of activating *nif* gene expression

101 under nitrogen excess conditions only when certain carbon sources are available in  
102 the environment, thus setting the foundation for engineering a synthetic symbiosis to  
103 deliver fixed nitrogen to cereal crops.

104

## 105 **Results**

### 106 **The activity of NifA-E356K is not regulated in response to the nitrogen status in**

#### 107 ***A. vinelandii*, resulting in ammonia excretion**

108 Previously the NifA-E356K variant protein was characterized either *in vivo*  
109 using *E. coli* as a chassis, or *in vitro* using purified protein components (20, 21). To  
110 evaluate if this variant protein would bypass NifL regulation in the original *A. vinelandii*  
111 DJ background, we introduced the *nifA-E356K* mutation into the chromosome and  
112 examined its influence on transcriptional regulation of the nitrogenase structural genes  
113 using RT-qPCR. As anticipated, no *nifH* transcripts were detected in the wild type  
114 strain (DJ) in the presence of either 25 or 5 mM of ammonium acetate, whilst increased  
115 transcript levels were observed in the absence of ammonium (Fig. 1A). In contrast,  
116 high levels of *nifH* transcripts were observed in all conditions tested for the *nifA-E356K*  
117 mutant strain (EK) (Fig. 1B), confirming that *nifA-E356K* is able to escape nitrogen  
118 regulation in *A. vinelandii*. Comparison of the levels of *nifH*, *nifL* and *nifA* transcripts  
119 in the EK strain relative to the wild type (DJ) (Fig. 1C) revealed that whilst *nifH* levels  
120 are higher in the EK mutant, this is not correlated with increased levels of *nifL* and *nifA*  
121 transcripts. This is in line with previous reports establishing that *nifLA* expression is  
122 not subject to autoactivation by NifA in *A. vinelandii* (24, 25) and suggests that  
123 constitutive expression of the nitrogenase structural gene operon in the EK mutant is  
124 intrinsic to the *nifA-E356K* mutation itself, rather than a consequence of  
125 overexpression of this mutant gene. The increase in *nifH* transcripts correlated with

126 higher nitrogenase activity in the EK strain, which was not regulated in response to  
127 excess fixed nitrogen, in contrast to the wild-type strain (Fig. 1D). As anticipated from  
128 the energetic constraints associated with constitutive expression and activity of  
129 nitrogenase, the EK mutant had an apparent growth deficiency in liquid media  
130 (Supplementary Material Fig. S1). However, when an insertion replacing the *nifH*  
131 structural gene was introduced into the EK strain to generate strain EKH (EK,  
132  $\Delta nifH::tetA$ ) this growth penalty was alleviated (Fig. S1-D-F) suggesting that it results  
133 from unregulated expression and activity of nitrogenase.

134 When cultivated under diazotrophic conditions in nitrogen-free media  
135 supplemented with sucrose as carbon source, the EK strain excreted millimolar levels  
136 of ammonia (Fig. 1E). The onset of ammonia excretion occurred at the early stages of  
137 growth (O.D<sub>600nm</sub> 0.3 - 0.6) reaching a peak at mid to late-exponential phase (O.D<sub>600nm</sub>  
138 1.4 - 2.0) and declined upon entry into stationary phase, potentially as a consequence  
139 of oxygen limitation and lower nitrogen fixation rates.

140

#### 141 **Nitrogen fixation and ammonium assimilation are uncoupled in the *nifA-E356K*** 142 **mutant strain**

143 It is perhaps surprising that a single amino acid substitution in NifA enables  
144 ammonia excretion, since lowering the flux of ammonia assimilation through  
145 the glutamine synthetase-glutamate synthase (GS-GOGAT) pathway is expected to  
146 be an additional pre-requisite for high level release of ammonia. The enzyme  
147 glutamine synthetase (GS) is a key component for ammonia assimilation in  
148 proteobacteria and is subject to post-translational regulation via adenylation in  
149 response to the nitrogen status (26, 27). Under excess nitrogen conditions, GS is  
150 adenylylated reducing its biosynthetic activity (3, 27). Comparison of the Mg<sup>2+</sup>, ATP-  
151 dependent glutamine synthetase biosynthetic (GSB) and the Mn<sup>2+</sup>, AsO<sub>4</sub><sup>-</sup>, ADP-

152 dependent glutamine transferase (GST) activities can provide a snapshot of GS  
153 adenylylation states *in vivo*, given that GSB activity can only be detected in the non-  
154 adenylylated enzyme subunits (28–30). We observed that GSB activity was higher in  
155 wild type (DJ) when compared to the mutant (EK) in all growth phases when cells were  
156 cultivated under diazotrophic conditions (green shaded plots in Fig. 2A). Conversely,  
157 GST activity was higher in the *nifA-E356K* strain (EK) than in the wild type (DJ) (Fig.  
158 2B). A comparison of GST/GSB ratios in both strains (Fig. 2C) demonstrated that GS  
159 in the wild type (DJ) is likely to be entirely non-adenylylated under diazotrophic  
160 conditions (GST/GSB ratio  $\leq 1$ ), whilst the NifA-E356K mutant (EK) had much higher  
161 GST/GSB ratios (ranging from 15 to 30-fold) suggesting that in this mutant strain, GS  
162 is more heavily adenylylated. Under fixed nitrogen excess conditions (yellow shaded  
163 plots in Fig. 2), as anticipated, a marked reduction of GSB activity was observed in the  
164 DJ strain (Fig. 2A, yellow plot) followed by an increase in the GST activity (Fig. 2B,  
165 yellow plot). For the EK strain however, relatively minor changes in GSB and GST  
166 activities occurred in response to the nitrogen status. A slight increase in GSB activity  
167 was observed in the EK strain under nitrogen excess conditions, but this was not  
168 apparently associated with changes in the expression of GS (*glnA*) itself (Fig. S2).  
169 Taken together, these results confirm that the ability of the *nifA-E356K* mutant strain  
170 to assimilate ammonia via GS is reduced compared to the wild type under diazotrophic  
171 conditions. This is likely to be a consequence of increased adenylylation by the  
172 bifunctional adenylyl transferase enzyme GlnE, which carries out post-translational  
173 modification of GS in response to the nitrogen status. Since deletion of *glnE* prevents  
174 adenylylation of GS in *A. vinelandii* (31), we introduced a *glnE* deletion into the *nifA-*  
175 *E356K* background to generate the strain EK $\Delta$ E. Under diazotrophic conditions, GSB  
176 and GST activities in the EK $\Delta$ E strain were similar to the those in the wild type strain  
177 (DJ) and clearly distinct from the activities in the *nifA-E356K* strain (EK) (compare  
178 green shaded plots in Fig. 2A-B and Fig. 2D-E). However, as anticipated from the  
179 absence of adenylyl transferase activity, addition of ammonium to the media did not  
180 lead to either reduction of GSB or increased GST activity in the EK $\Delta$ E strain when



181 compared to the DJ strain (compare yellow shaded plots in Fig. 2A-B and Fig. 2D-E).  
182 As expected from the increased GS biosynthetic activity exhibited by the EKΔE strain  
183 under nitrogen excess conditions, ammonia excretion was ablated in this strain (Fig.  
184 2F and Fig. S3). These results therefore imply that the ability of the *nifA-E356K* (EK)  
185 strain to excrete ammonia is dependent upon feedback regulation, resulting in  
186 constitutive adenylation of GS and hence decreased ammonia assimilation.  
187

### 188 **Carbon signalling dominates regulation of *nif* gene expression in the *nifA-*** 189 ***E356K* strain**

190 All the above experiments were conducted in media containing sucrose, a  
191 carbon source enabling a high flux through the TCA cycle that evidently maintains  
192 sufficient 2-oxoglutarate to activate NifA in *A. vinelandii*. Although the potential for  
193 carbon regulation, signalled via binding of 2-oxoglutarate to the NifA GAF domain, has  
194 been well established *in vitro*, the physiological relevance of 2-oxoglutarate in NifL-  
195 NifA regulation has not been clearly demonstrated *in vivo*. NifA-E356K requires 2-  
196 oxoglutarate in order to escape inhibition by NifL in the presence of GlnK *in vitro* (14,  
197 21), suggesting that its ability to bypass nitrogen regulation *in vivo* might be regulated  
198 by carbon source availability. To facilitate correlation of nitrogenase activity with  
199 expression of the nitrogenase structural genes when strains were grown on different  
200 carbon sources we constructed strains containing a translational *nifH::lacZ* fusion  
201 located at a neutral site in the chromosome (see Supplementary Material and Table  
202 S1). Initial screening for the ability of the NifA-E356K protein to escape nitrogen  
203 regulation in several carbon sources (Figure S4) revealed that this variant protein  
204 supported strong activation of the *nifH* promoter under nitrogen excess conditions  
205 when grown in sucrose, glucose or glycerol. In contrast, only approximately 20-40%  
206 of the maximum activity was observed when cells were grown in succinate, fumarate,

207 malate, pyruvate or acetate as the sole carbon source. Further comparisons of Av-  
208 NifA-E356K activity were performed comparing sucrose and acetate as carbon  
209 sources given that the growth penalty difference between the DJ and EK strains was  
210 significantly alleviated in acetate (Figure S5).

211 When wild type *A. vinelandii* was subjected to a carbon shift from sucrose to  
212 acetate, a significant reduction in both *nifH* expression (Fig. 3A) and nitrogenase  
213 activity (Fig. 3B) was observed and as expected, both activities were repressed in the  
214 presence of ammonium (+N). However, the ability of the EK strain to escape regulation  
215 by fixed nitrogen (+N) was severely compromised when grown on acetate (Fig. 3D  
216 and Fig. 3E). These results demonstrate that NifA-E356K responds to carbon status  
217 regulation *in vivo*, as anticipated from the *in vitro* characterization experiments (14,  
218 21). Since 2-oxoglutarate is required to activate NifA only when NifL is present, we  
219 examined nitrogen and carbon regulation in the previously characterised strain  
220 AZBB163 in which *nifL* is disrupted by a kanamycin resistance cassette. (19). In this  
221 case, in contrast to NifA-E356K, nitrogenase activity was constitutive and not strongly  
222 influenced by the carbon source (Fig. S6B). However, this strain exhibited unexpected  
223 patterns of *nifH* expression when grown on sucrose that did not correlate with  
224 nitrogenase activity (Fig. S6A), potentially because *nifA* expression is not driven by  
225 the native *nifL* promoter in strain AZBB163 (19). Taken together, these results  
226 demonstrate that nitrogenase expression and activity is suppressed in the EK strain  
227 when grown under nitrogen excess conditions with acetate as the sole carbon source.  
228 Since the NifA-E356K protein is unable to escape nitrogen regulation mediated by NifL  
229 and GlnK when 2-oxoglutarate is limiting *in vitro*, this metabolite is likely to provide the  
230 physiological signal that triggers the carbon source response. Quantification of internal  
231 2-oxoglutarate levels in strains grown on the different carbon sources (Fig. 3C and

232 Fig. 3F) supports previous evidence that the levels of this metabolite are sensitive to  
233 the carbon and nitrogen supply (15, 32). In the wild type strain (DJ), 2-oxoglutarate  
234 levels dropped significantly in acetate compared to sucrose and a further decrease  
235 was observed when excess fixed nitrogen was present regardless of the type of  
236 carbon source (Fig. 3C). 2-oxoglutarate levels in the *nifA-E356K* strain were generally  
237 higher than in the wild type, but were influenced in a similar manner in relation to  
238 carbon and nitrogen source availability (Fig. 3F). Overall, the fluctuations in the 2-  
239 oxoglutarate levels correlated well with nitrogenase activity and expression for both  
240 the wild type (compare Fig. 3, panels A-C) and the *nifA-E356K* mutant (compare Fig.  
241 3, panels D-F), reinforcing the importance of carbon signalling in the regulation of  
242 nitrogen fixation. Notably, when the 2-oxoglutarate level decreased below 350  $\mu$ M in  
243 the *nifA-E356K* strain (Fig. 3F, acetate +N condition) nitrogen regulation was less  
244 effectively bypassed *in vivo* (Fig. 3, panels D-E), commensurate with previous *in vitro*  
245 biochemical data (14, 33). Consequently, lower levels of ammonia excretion were  
246 detectable when the *nifA-E356K* strain was grown on acetate (Fig. 3G). In accordance  
247 with this, the growth rate penalty observed in the EK (*nifA-E356K*) strain in the  
248 presence of sucrose was significantly reduced when acetate was the carbon source  
249 (Fig S5).

250

### 251 **NifA-E356K is a prototype for engineering conditional ammonia excretion in** 252 **diazotrophic Proteobacteria**

253 As the NifL-NifA operon is widely distributed in Proteobacteria (reviewed in 3)  
254 and the glutamate residue at position 356 in *A. vinelandii* NifA is highly conserved in  
255 other Proteobacteria (Fig. 4 panels A and B), we sought to evaluate if introduction of  
256 the reciprocal amino acid substitution in NifA proteins from other Proteobacteria, would

257 yield the same regulation profile as in *A. vinelandii*. Using a previously established  
258 two-plasmid system to study the *A. vinelandii* NifL-NifA system in an *E. coli*  
259 background (11) we evaluated the activity of NifA variants from *Pseudomonas stutzeri*  
260 A1501 (22, 23) and *Azoarcus olearius* DQS-4 (34, 35). Both of these species are  
261 thought to be well adapted for the endophytic lifestyle and therefore are attractive  
262 model organisms for engineering ammonia excretion to benefit plant growth. The  
263 activities of wild type *P. stutzeri* NifA and *A. olearius* NifA in the presence of their  
264 corresponding NifL partners were higher than wild type *A. vinelandii* NifA under  
265 nitrogen-limiting conditions (-N) but as expected, were strongly inhibited in the  
266 presence of fixed nitrogen (+N) (Fig. 4, panels C-E). In contrast, the reciprocal NifA-  
267 E356K substitutions in *P. stutzeri* NifA (Ps-NifA-E356K) and *A. olearius* NifA (Ao-NifA-  
268 E351K) gave rise to constitutive activation of the *nifH* promoter in nitrogen replete (+N)  
269 conditions in *E. coli* (Fig. 4 panels D-E, respectively).

270 To examine the properties of the Ps-NifA-E356K substitution in its endophytic  
271 host, we introduced the corresponding *nifA* mutation into the chromosome of *P.*  
272 *stutzeri* A1501. However, contrary to *A. vinelandii*, this single mutation (in strain Ps-  
273 EK) did not result in constitutive *nifH* transcription (Fig. S7), presumably because  
274 expression of the *nifLA* operon itself is regulated by nitrogen availability in *P. stutzeri*  
275 (23, 36). In order to remove this second layer of nitrogen regulation, we replaced the  
276 native *P.stutzeri nifL* promoter with the *A. vinelandii nifL* promoter. Although this  
277 replacement (in the strain Ps\_*nifLA*<sup>C</sup>) suppressed nitrogen control of *nifA* transcription  
278 as anticipated, constitutive *nifH* transcription was not observed, confirming that the *P.*  
279 *stutzeri* wild-type NifL-NifA system remains responsive to nitrogen regulation when  
280 expressed constitutively (Fig. S7). To examine the intrinsic ability of Ps-NifA-E356K to  
281 escape nitrogen control, we combined the *A. vinelandii nifL* promoter replacement with  
282 the *nifA-E356K* mutation in *P. stutzeri* (Fig. 5A). Although this strain (Ps-EK<sup>C</sup>)  
283 expressed relatively low levels of *nifLA* transcripts under diazotrophic (-N) conditions

284 (Fig. S7 F-G), direct correlation between the levels of *nifLA* and *nifH* transcripts was  
285 observed in excess nitrogen (+N) conditions, confirming that the E356K substitution  
286 enables Ps-NifA to escape nitrogen regulation mediated by NifL and GlnK in *P. stutzeri*  
287 (Fig. S7, panels F-H).

288 The Ps-EK<sup>C</sup> strain was able to activate *nifH* transcription on a variety of carbon  
289 sources when grown under nitrogen excess conditions (+N) with lactate yielding the  
290 highest level of *nifH* activation followed by glucose, malate and glycerol (Fig 5B). This  
291 carbon source-dependent activation of *nifH* transcription by Ps-NifA-E356K correlated  
292 directly with the level of nitrogenase activity in each condition (compare Fig. 5B and  
293 5C). As anticipated from the relatively high level of *nifH* transcription and nitrogenase  
294 activity conferred by growth on lactate, ammonia excretion was only observed when  
295 the Ps-EK<sup>C</sup> strain was grown on this carbon source (Fig. 5D). Finally, we observed no  
296 growth penalty for the Ps-EK<sup>C</sup> strain when grown on complex media (LB) or in minimal  
297 media supplemented with glucose, malate, lactate or glycerol as carbon sources (Fig  
298 S8), which implies that the relatively moderate activation of *nif* gene transcription in  
299 the Ps-EK<sup>C</sup> strain, allows carbon regulated ammonia excretion without severe impacts  
300 to bacterial fitness. Altogether, these observations suggest that introducing the  
301 reciprocal E356K substitution into NifA proteins from diazotrophic Proteobacteria, may  
302 be broadly applicable for engineering new bacterial strains with carbon-controlled  
303 excretion of ammonia.

304

## 305 **Discussion**

306 In order to cope with the energetic cost of biological nitrogen fixation,  
307 diazotrophic bacteria require sophisticated signal transduction mechanisms ensuring  
308 efficient adaption to changing conditions whilst successfully competing in the  
309 environment. Achieving an appropriate balance between carbon and nitrogen  
310 metabolism is particularly challenging for organisms that fix nitrogen, requiring  
311 diversion of ATP and reducing equivalents from central metabolism to ensure

312 nitrogenase catalytic rates that meet the nitrogen demands required for growth. Hence  
313 the ability to sense carbon availability in addition to the nitrogen status, is paramount  
314 to resource allocation and to resolve conflicting metabolic demands.

315         The physiological signal for carbon status control is most likely to be 2-  
316 oxoglutarate given the correlation observed here between the level of this metabolite  
317 with nitrogen regulation *in vivo*, together with our previous biochemical demonstration  
318 of the importance of this ligand in NifL-NifA regulation (14, 37). We propose that this  
319 additional level of metabolite regulation provides a mechanism to integrate signals of  
320 the carbon and nitrogen status to ensure that sufficient carbon resources are available  
321 to support diazotrophy. The *in vitro* data indicate that when 2-oxoglutarate is limiting,  
322 NifL, forms a binary complex with NifA, which inhibits its activity, even under nitrogen-  
323 limiting conditions when GlnK is fully uridylylated and unable to interact with nifL (Fig.  
324 6A). However, when sufficient levels of 2-oxoglutarate are available (Fig. 6B) the NifL-  
325 NifA complex dissociates, enabling NifA to activate *nif* transcription (2, 4, 14, 37). Upon  
326 a switch to excess nitrogen conditions, GlnK becomes de-uridylylated allowing the  
327 formation of a ternary GlnK-NifL-NifA complex that inactivates NifA irrespective of the  
328 level of 2-oxoglutarate (Fig. 6C and 6D). Hence in the wild-type NifL-NifA system, the  
329 nitrogen status signal overrides the metabolic signal of the carbon status, when excess  
330 fixed nitrogen is available. In contrast, in the variant NifA-E356K protein studied here,  
331 the integration between nitrogen and carbon control is disrupted. Although this  
332 substitution in the AAA+ domain of NifA (red star, Fig. 6E) perturbs the interaction with  
333 NifL, the GlnK-NifL-NifA-E356K ternary complex still forms if 2-oxoglutarate is limiting  
334 (Fig. 6E). In contrast, when 2-oxoglutarate levels are sufficient, conformational  
335 changes triggered by its binding to the GAF domain disrupt the ternary complex,  
336 enabling NifA-E356K to be active in the presence of excess fixed nitrogen (Fig. 6F).

337 Therefore, although the E356K substitution escapes nitrogen control, conferred by  
338 resistance to the GlnK bound form of NifL, this is contingent upon the binding of 2-  
339 oxoglutarate to the GAF domain of this variant protein. The response of the NifL-NifA  
340 system to 2-oxoglutarate thus emphasises the key role of this metabolite as a master  
341 signalling molecule (15). Consequently, the ability of the NifA-E356K variant to bypass  
342 nitrogen regulation *in vivo* in both *A. vinelandii* and *P. stutzeri* is dependent on the  
343 carbon status. The crucial role of carbon-mediated signalling in the regulation of  
344 nitrogen fixation was evident from reduced *nifH* transcripts and activity of nitrogenase  
345 when the *A. vinelandii nifA-E356K* strain was cultured under nitrogen excess  
346 conditions with acetate as sole carbon source, which correlated with a significant  
347 decrease in the level of 2-oxoglutarate and a 6-fold reduction in ammonium excretion  
348 compared with sucrose as carbon source. Similarly, in *P. stutzeri* where lactate  
349 appears to be a preferred carbon source to support nitrogen fixation in comparison to  
350 glucose, the *nifA-E356K* mutant exhibited the highest level of *nifH* transcripts and  
351 nitrogenase activity under nitrogen excess conditions when lactate was provided as a  
352 carbon source. Not surprisingly, amongst the carbon sources tested, the *P. stutzeri*  
353 EK<sup>C</sup> strain only excreted ammonia when provided with lactate under our experimental  
354 conditions. The capacity for runaway expression of *nif* genes, constitutive nitrogenase  
355 activity and ammonia excretion is therefore dependent on the nature of the carbon  
356 source. Our studies with *A. vinelandii* and *P. stutzeri* therefore demonstrate the  
357 potential to exploit the intrinsic carbon-sensing mechanism of the NifL-NifA system to  
358 provide conditional release of fixed nitrogen and hence alleviate the fitness penalty  
359 associated with constitutive expression of nitrogenase.

360 Bypassing nitrogen regulation of the NifL-NifA system to activate constitutive  
361 expression of nitrogenase would not by itself be anticipated to promote ammonia

362 release, if the excess ammonia can be assimilated by the GS-GOGAT pathway. We  
363 have demonstrated that overexpression of nitrogenase in the *A. vinelandii nifA-E356K*  
364 strain leads to feedback regulation of GS activity via co-valent modification by the  
365 adenylyl transferase activity of GlnE. This reduction of nitrogen assimilation via post-  
366 translational modification of glutamine synthetase is a key factor in enabling ammonia  
367 excretion, which is not observed in the *nifA-E356K* strain when the *glnE* gene is  
368 deleted. Hence, in *A. vinelandii*, ammonia excretion is also dependent on the native  
369 feedback regulation of GS activity, exacerbated by higher rates of nitrogen fixation in  
370 the *nifA-E356K* strain when grown on a carbon source that sustains high levels of 2-  
371 oxoglutarate under excess nitrogen conditions. This uncoupling of nitrogen fixation  
372 from ammonium assimilation is somewhat analogous to what is observed in  
373 differentiated nitrogen-fixing bacteroids in the legume-rhizobium symbiosis, where the  
374 flux through the ammonia assimilation pathway is severely restricted to enable release  
375 of most of the nitrogen fixed by the symbiont (38, 39). Analogous strategies to  
376 decrease the activity of GS in non-symbiotic bacteria have resulted in ammonia  
377 excretion (40–42), but to date have not been combined with mutations that express  
378 high levels of nitrogenase on a conditional basis as deployed here.

379         Since introduction of the reciprocal E356K substitution into NifA proteins from  
380 other members of the Proteobacteria also results in nitrogen-insensitive activators  
381 when analysed either in a heterologous chassis, *E. coli* (Fig. 4), or in *P. stutzeri* (Fig.  
382 5), this strategy may allow generation of new diazotrophic strains with conditional  
383 excretion of ammonia. The carbon responsive control mechanism could present an  
384 opportunity for activation of ammonium excretion contingent upon carbon sources  
385 provided by root exudates of crops, a feature highly desirable in the engineering of a  
386 synthetic symbiosis (43, 44). However, given the regulatory complexities associated



387 with fine-tuning nitrogen regulation in diverse Proteobacteria, additional manipulations  
388 to disrupt transcriptional control of NifL-NifA expression itself or the coupling between  
389 nitrogen fixation and assimilation may be needed to achieve ammonia excretion (3,  
390 45). One such example explored in this study was the need to remove native nitrogen  
391 regulation from the *P. stutzeri* A1501 *nifLA* promoter. Serendipitously, we  
392 demonstrated that providing relatively low levels of the *nifA-E356K* transcripts in *P.*  
393 *stutzeri* generated a strain with carbon-regulated ammonia excretion without the  
394 severe growth penalties observed in *A. vinelandii*. Furthermore, we demonstrated that  
395 the levels of ammonia excretion are directly correlated with specific nitrogenase  
396 activity rates in both organisms analysed. Under optimal conditions of carbon and  
397 oxygen supply, the *A. vinelandii nifA-E356K* mutant sustained a very high rate of  
398 nitrogenase activity (200-300 nmol C<sub>2</sub>H<sub>4</sub>.mg protein<sup>-1</sup>.min<sup>-1</sup>) under nitrogen excess  
399 conditions. On the other hand, in *P. stutzeri* the levels of nitrogenase activity conferred  
400 by *nifA-E356K* were at least 100-fold lower under our experimental conditions. Hence,  
401 *A. vinelandii* excreted millimolar levels of ammonia in contrast to the micromolar levels  
402 observed in *P. stutzeri*. As the ammonium excreting strain from *P. stutzeri* was not  
403 subject to the same growth penalty observed in the *A. vinelandii* counterpart, we  
404 anticipate that these studies will guide future efforts to define more precise trade-offs  
405 to engineer nitrogen releasing strains that do not have a competitive disadvantage in  
406 the rhizosphere. Moreover, the addition of multi-layered regulatory control of ammonia  
407 excretion by expressing activator variants under the control of promoters that respond  
408 to specific signalling molecules exchanged between the plant and the bacteria, may  
409 deliver the required level of specificity for the establishment of an efficient synthetic  
410 symbiosis (46, 47).

411

## 412 **Materials and Methods**

413 Detailed methods are available in the Supplementary Material. Bacterial stains  
414 are listed in Table S1, plasmids are listed in Table S2 and primers are listed in Table  
415 S3.

## 416 **Author Contributions**

417 M.B.B, Y-P.W and R.D designed research, M.B.B, P.B. and C.A-A. performed  
418 experiments and M.B.B, Y-P.W and R.D. wrote the manuscript

419

## 420 **Acknowledgements**

421 We are indebted to Brett Barney for the strain AZBB163 and to Adriano  
422 Stefanello for the plasmid pAAS1544. We are grateful to all members of the laboratory  
423 support team at the John Innes Centre for their excellent assistance. This study was  
424 supported by the UKRI Biotechnology and Biological Sciences Research Council  
425 (grants BB/N013476/1 and BB/N003608/1), the Royal Society (ICAR1\180088), the  
426 National Science Foundation of China (NSFC, grant 32020103002) , and the National  
427 Key R&D Program of China (grant 2019YFA0904700).

428

429

## 430 **References**

- 431 1. G. P. Roberts, W. J. Brill, Genetics and regulation of nitrogen fixation. *Annu.*  
432 *Rev. Microbiol.* **35**, 207–235 (1981).
- 433 2. R. Dixon, D. Kahn, Genetic regulation of biological nitrogen fixation. *Nat. Rev.*  
434 *Microbiol.* **2**, 621–31 (2004).
- 435 3. M. Bueno Batista, R. Dixon, Manipulating nitrogen regulation in diazotrophic  
436 bacteria for agronomic benefit. *Biochem. Soc. Trans.* **47**, 603–614 (2019).

- 437 4. I. Martinez-Argudo, R. Little, N. Shearer, P. Johnson, R. Dixon, The NifL-NifA  
438 System: a Multidomain Transcriptional Regulatory Complex That Integrates  
439 Environmental Signals. *J. Bacteriol.* **186**, 601–610 (2004).
- 440 5. I. Martinez-Argudo, R. Little, N. Shearer, P. Johnson, R. Dixon, Nitrogen  
441 fixation: key genetic regulatory mechanisms. *Biochem. Soc. Trans.* **33**, 152–6  
442 (2005).
- 443 6. S. Hill, S. Austin, T. Eydmann, T. Jones, R. Dixon, Azotobacter vinelandii NIFL  
444 is a flavoprotein that modulates transcriptional activation of nitrogen-fixation  
445 genes via a redox-sensitive switch. *Proc. Natl. Acad. Sci.* **93**, 2143–2148  
446 (1996).
- 447 7. P. Macheroux, *et al.*, Electron donation to the flavoprotein NifL, a redox-  
448 sensing transcriptional regulator. *Biochem. J.* **332**, 413–419 (1998).
- 449 8. R. Little, I. Martinez-Argudo, S. Perry, R. Dixon, Role of the H domain of the  
450 histidine kinase-like protein NifL in signal transmission. *J. Biol. Chem.* **282**,  
451 13429–13437 (2007).
- 452 9. P. Slavny, R. Little, P. Salinas, T. A. Clarke, R. Dixon, Quaternary structure  
453 changes in a second Per-Arnt-Sim domain mediate intramolecular redox signal  
454 relay in the NifL regulatory protein. *Mol. Microbiol.* **75**, 61–75 (2010).
- 455 10. T. Eydmann, *et al.*, Transcriptional activation of the nitrogenase promoter in  
456 vitro: Adenosine nucleotides are required for inhibition of NIFA activity by NIFL.  
457 *J. Bacteriol.* **177**, 1186–1195 (1995).
- 458 11. E. Söderbäck, *et al.*, The redox- and fixed nitrogen-responsive regulatory  
459 protein NIFL from Azotobacter vinelandii comprises discrete flavin and  
460 nucleotide-binding domains. *Mol. Microbiol.* **28**, 179–192 (1998).
- 461 12. R. Little, V. Colombo, A. Leech, R. Dixon, Direct interaction of the NifL

- 462 regulatory protein with the GlnK signal transducer enables the *Azotobacter*  
463 *vinelandii* NifL-NifA regulatory system to respond to conditions replete for  
464 nitrogen. *J. Biol. Chem.* **277**, 15472–15481 (2002).
- 465 13. P. Rudnick, C. Kunz, M. K. Gunatilaka, E. R. Hines, C. Kennedy, Role of GlnK  
466 in NifL-mediated regulation of NifA activity in *Azotobacter vinelandii*. *J.*  
467 *Bacteriol.* **184**, 812–820 (2002).
- 468 14. R. Little, R. Dixon, The amino-terminal GAF domain of *Azotobacter vinelandii*  
469 NifA binds 2-oxoglutarate to resist inhibition by NifL under nitrogen-limiting  
470 conditions. *J. Biol. Chem.* **278**, 28711–8 (2003).
- 471 15. L. F. Huergo, R. Dixon, The Emergence of 2-Oxoglutarate as a Master  
472 Regulator Metabolite. *Microbiol. Mol. Biol. Rev.* **79**, 419–435 (2015).
- 473 16. A. Bali, G. Blanco, S. Hill, C. Kennedy, Excretion of ammonium by a nifL  
474 mutant of *Azotobacter vinelandii* fixing nitrogen. *Appl. Environ. Microbiol.* **58**,  
475 1711–8 (1992).
- 476 17. B. Brewin, P. Woodley, M. Drummond, The basis of ammonium release in nifL  
477 mutants of *Azotobacter vinelandii*. *J. Bacteriol.* **181**, 7356–62 (1999).
- 478 18. J. C. F. Ortiz-Marquez, M. Do Nascimento, M. de los A. Dublan, L. Curatti,  
479 Association with an ammonium-excreting bacterium allows diazotrophic culture  
480 of oil-rich eukaryotic microalgae. *Appl. Environ. Microbiol.* **78**, 2345–52 (2012).
- 481 19. B. M. Barney, L. J. Eberhart, J. M. Ohlert, C. M. Knutson, M. H. Plunkett, Gene  
482 Deletions Resulting in Increased Nitrogen Release by *Azotobacter vinelandii*:  
483 Application of a Novel Nitrogen Biosensor. *Appl. Environ. Microbiol.* **81**, 4316–  
484 4328 (2015).
- 485 20. F. Reyes-Ramirez, R. Little, R. Dixon, Mutant Forms of the *Azotobacter*  
486 *vinelandii* Transcriptional Activator NifA Resistant to Inhibition by the NifL

- 487           Regulatory Protein. *J. Bacteriol.* **184**, 6777–6785 (2002).
- 488   21.   I. Martinez-Argudo, R. Little, R. Dixon, Role of the amino-terminal GAF domain  
489           of the NifA activator in controlling the response to the antiactivator protein NifL.  
490           *Mol. Microbiol.* **52**, 1731–1744 (2004).
- 491   22.   J. Lalucat, A. Bennasar, R. Bosch, E. Garcia-Valdes, N. J. Palleroni, Biology of  
492           *Pseudomonas stutzeri*. *Microbiol. Mol. Biol. Rev.* **70**, 510–547 (2006).
- 493   23.   Y. Yan, *et al.*, Nitrogen fixation island and rhizosphere competence traits in the  
494           genome of root-associated *Pseudomonas stutzeri* A1501. *Proc. Natl. Acad.*  
495           *Sci.* **105**, 7564–7569 (2008).
- 496   24.   R. Raina, U. K. Bageshwar, H. K. Das, The *Azotobacter vinelandii* nifL-like  
497           gene: nucleotide sequence analysis and regulation of expression. *Mol. Gen.*  
498           *Genet.* **237**, 400–6 (1993).
- 499   25.   G. Blanco, M. Drummond, P. Woodley, C. Kennedy, Sequence and molecular  
500           analysis of the nifL gene of *Azotobacter vinelandii*. *Mol. Microbiol.* **9**, 869–879  
501           (1993).
- 502   26.   E. R. Stadtman, The Story of Glutamine Synthetase Regulation. *J. Biol. Chem.*  
503           **276**, 44357–44364 (2001).
- 504   27.   W. C. van Heeswijk, H. V Westerhoff, F. C. Boogerd, Nitrogen assimilation in  
505           *Escherichia coli*: putting molecular data into a systems perspective. *Microbiol.*  
506           *Mol. Biol. Rev.* **77**, 628–95 (2013).
- 507   28.   B. M. Shapiro, E. R. Stadtman, Glutamine Synthetase (*Escherichia coli*).  
508           *Methods Enzymol.* **17**, 910–922 (1970).
- 509   29.   R. B. Goldberg, R. Hanau, Relation between the adenylation state of  
510           glutamine synthetase and the expression of other genes involved in nitrogen  
511           metabolism. *J. Bacteriol.* **137**, 1282–1289 (1979).

- 512 30. R. A. Bender, *et al.*, Biochemical parameters of glutamine synthetase from  
513 *Klebsiella aerogenes*. *J. Bacteriol.* **129**, 1001–9 (1977).
- 514 31. F. Mus, A. Tseng, R. Dixon, J. W. Peters, Diazotrophic Growth Allows  
515 *Azotobacter vinelandii* To Overcome the Deleterious Effects of a *glnE* Deletion.  
516 *Appl. Environ. Microbiol.* **83**, e00808-17 (2017).
- 517 32. D. Yan, P. Lenz, T. Hwa, Overcoming fluctuation and leakage problems in the  
518 quantification of intracellular 2-oxoglutarate levels in *Escherichia coli*. *Appl.*  
519 *Environ. Microbiol.* **77**, 6763–6771 (2011).
- 520 33. F. Reyes-Ramirez, R. Little, R. Dixon, Role of *Escherichia coli* Nitrogen  
521 Regulatory Genes in the Nitrogen Response of the *Azotobacter vinelandii* NifL-  
522 NifA Complex. *J. Bacteriol.* **183**, 3076–3082 (2001).
- 523 34. H. Faoro, *et al.*, The oil-contaminated soil diazotroph *Azoarcus olearius* DQS-  
524 4T is genetically and phenotypically similar to the model grass endophyte  
525 *Azoarcus* sp. BH72. *Environ. Microbiol. Rep.* **9**, 223–238 (2017).
- 526 35. R. Dixon, A. Hartmann, Novel insights into ecological distribution and plant  
527 growth promotion by nitrogen-fixing endophytes. *Environ. Microbiol. Rep.* **9**,  
528 179–181 (2017).
- 529 36. N. Desnoues, *et al.*, Nitrogen fixation genetics and regulation in a  
530 *Pseudomonas stutzeri* strain associated with rice. *Microbiology* **149**, 2251–  
531 2262 (2003).
- 532 37. R. Little, F. Reyes-Ramirez, Y. Zhang, W. C. van Heeswijk, R. Dixon, Signal  
533 transduction to the *Azotobacter vinelandii* NIFL-NIFA regulatory system is  
534 influenced directly by interaction with 2-oxoglutarate and the PII regulatory  
535 protein. *EMBO J.* **19**, 6041–6050 (2000).
- 536 38. E. J. Patriarca, R. Tatè, M. Iaccarino, Key role of bacterial NH<sub>4</sub>(+)

- 537 metabolism in Rhizobium-plant symbiosis. *Microbiol. Mol. Biol. Rev.* **66**, 203–  
538 22 (2002).
- 539 39. M. Udvardi, P. S. Poole, Transport and Metabolism in Legume-Rhizobia  
540 Symbioses. *Annu. Rev. Plant Biol.* **64**, 781–805 (2013).
- 541 40. H. B. Machado, S. Funayama, L. U. Rigo, F. O. Pedrosa, Excretion of  
542 ammonium by *Azospirillum brasilense* mutants resistant to ethylenediamine.  
543 *Can. J. Microbiol.* **37**, 549–553 (1991).
- 544 41. J. C. F. Ortiz-Marquez, M. Do Nascimento, L. Curatti, Metabolic engineering of  
545 ammonium release for nitrogen-fixing multispecies microbial cell-factories.  
546 *Metab. Eng.* **23**, 154–164 (2014).
- 547 42. R. Ambrosio, J. C. F. Ortiz-Marquez, L. Curatti, Metabolic engineering of a  
548 diazotrophic bacterium improves ammonium release and biofertilization of  
549 plants and microalgae. *Metab. Eng.* **40**, 59–68 (2017).
- 550 43. B. A. Geddes, *et al.*, Use of plant colonizing bacteria as chassis for transfer of  
551 N<sub>2</sub>-fixation to cereals. *Curr. Opin. Biotechnol.* **32**, 216–222 (2015).
- 552 44. F. Mus, *et al.*, Symbiotic Nitrogen Fixation and the Challenges to Its Extension  
553 to Nonlegumes. *Appl. Environ. Microbiol.* **82**, 3698–3710 (2016).
- 554 45. S. E. Bloch, *et al.*, Biological nitrogen fixation in maize: optimizing nitrogenase  
555 expression in a root-associated diazotroph. *J. Exp. Bot.* (2020)  
556 <https://doi.org/10.1093/jxb/eraa176>.
- 557 46. B. A. Geddes, *et al.*, Engineering transkingdom signalling in plants to control  
558 gene expression in rhizosphere bacteria. *Nat. Commun.* **10**, 1–11 (2019).
- 559 47. M. H. Ryu, *et al.*, Control of nitrogen fixation in bacteria that associate with  
560 cereals. *Nat. Microbiol.* **5**, 314–330 (2020).

561

## Figures

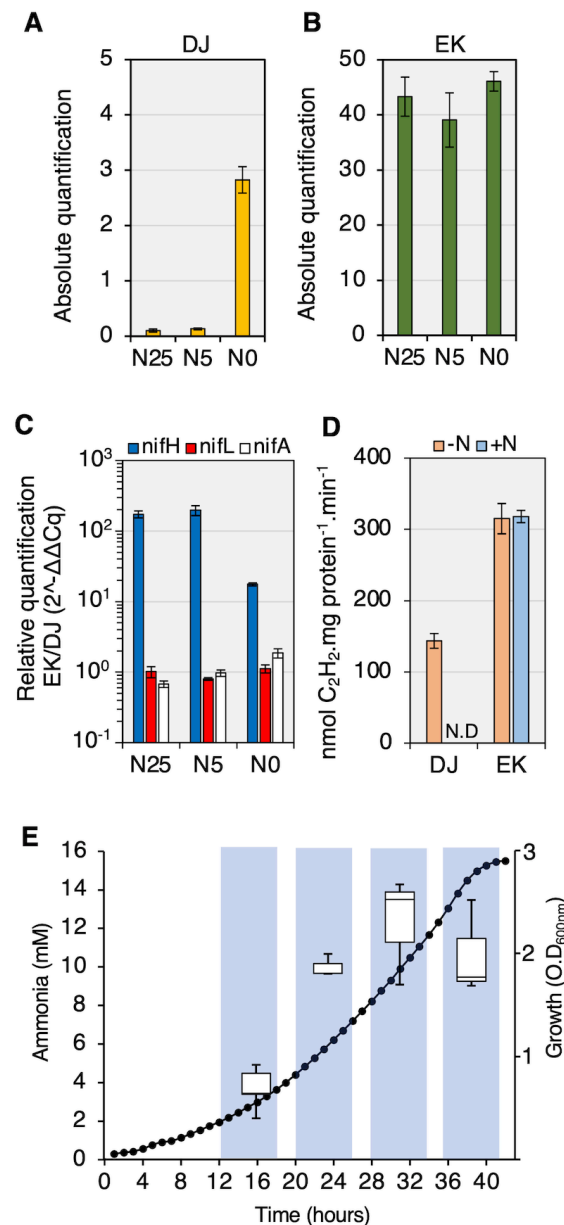

**Fig. 1 – Constitutive expression and activity of nitrogenase results in ammonia excretion by the *nifA-E356K* strain (EK) with sucrose as the carbon source.** (A) Absolute levels of *nifH* transcripts in the wild type (DJ) and (B) *nifA-E356K* (EK) under three different nitrogen regimes: 25 mM (N25), 5 mM (N5) or 0 mM (N0) ammonium acetate. (C) Relative levels of *nifH*, *nifL* and *nifA* transcripts between the strains EK and DJ. The graph is presented on a  $\log_{10}$  scale to emphasize that the relative levels of *nifL* and *nifA* transcripts are close to 1 in all conditions. (D) *In vivo* nitrogenase specific activities in the absence (-N) or presence (+N) of 20 mM ammonium chloride. Activity was determined by the acetylene reduction assay using cultures grown to an O.D.<sub>600nm</sub> between 0.3-0.4 as described in the methods. N.D: not detected. (E) Ammonia from the culture supernatant was quantified in the EK strain (left y axis, box blots) in the growth phases indicated by the bars shaded in blue (right y axis, closed circles).



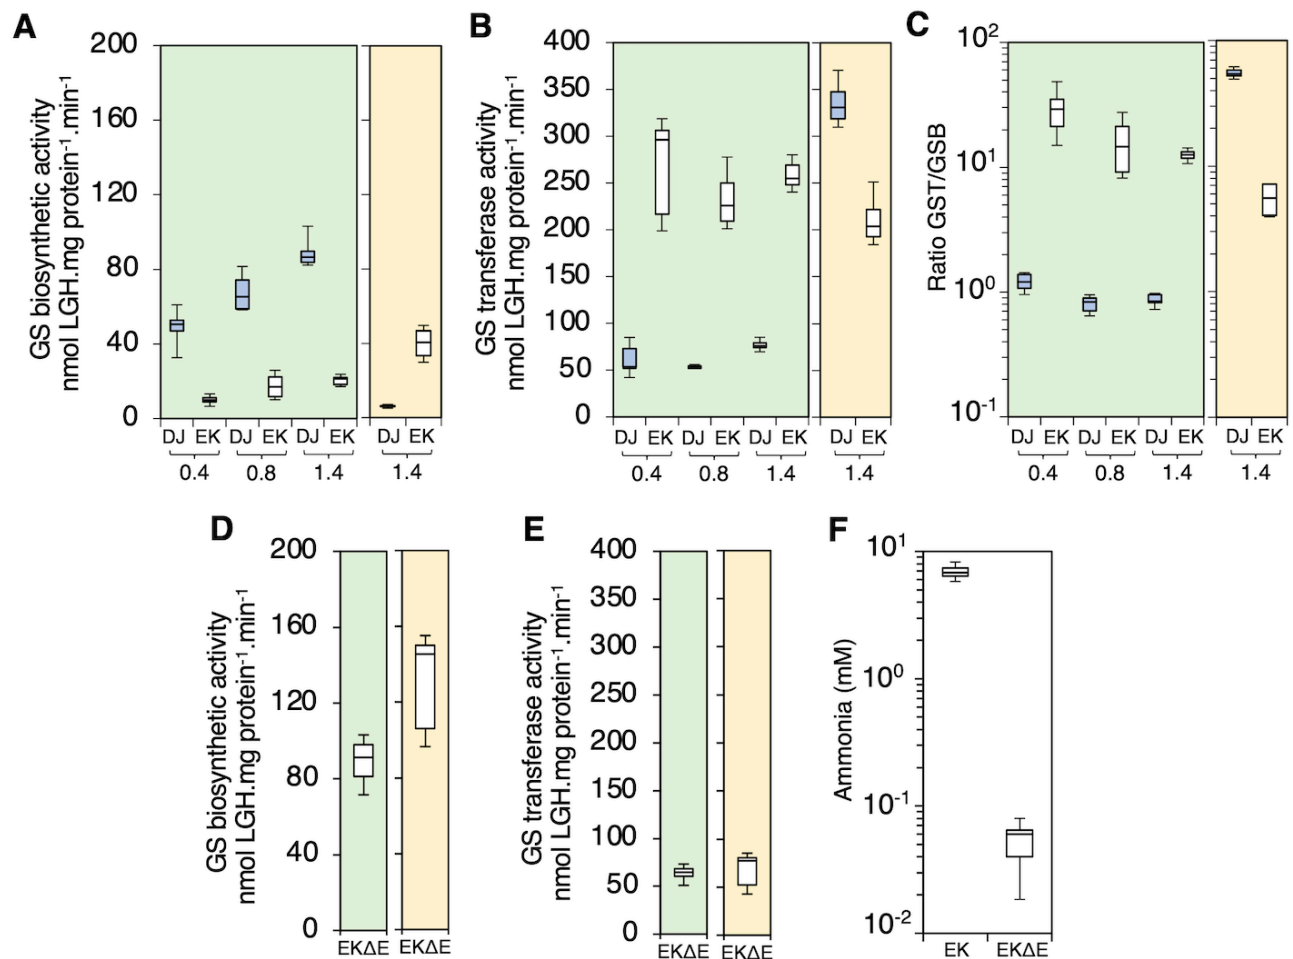

**Fig. 2 – Ammonia excretion is dependent upon lower glutamine synthetase biosynthetic activity in the *nifA-E356K* strain (EK).** (A) Glutamine synthetase (GS) biosynthetic and (B) transferase activities were measured in the wild type (DJ, blue box plots) and E356K (EK, white box plots) strains in three different phases of growth, corresponding to an O.D<sub>600 nm</sub> of 0.4, 0.8 and 1.4 as indicated. Ratio between GS transferase (GST) and GS biosynthetic (GSB) activities is presented in (C) on a  $\log_{10}$  scale to emphasize that the ratio between GST and GSB activities are close to 1 in the wild type (DJ) in all growth phases. (D) Glutamine synthetase (GS) biosynthetic and (E) transferase activities measured in the EKΔE strain (*nifA-E356K* with a *glnE* deletion) at an O.D<sub>600 nm</sub> of 0.8. The charts shaded in green represent the activities under diazotrophic conditions (-N), while those shaded in yellow represent the activity in the presence of excess fixed nitrogen, (20 mM NH<sub>4</sub>Cl, +N). (F) Ammonia from the culture supernatant was quantified in both EK and EKΔE strains grown under diazotrophic conditions.

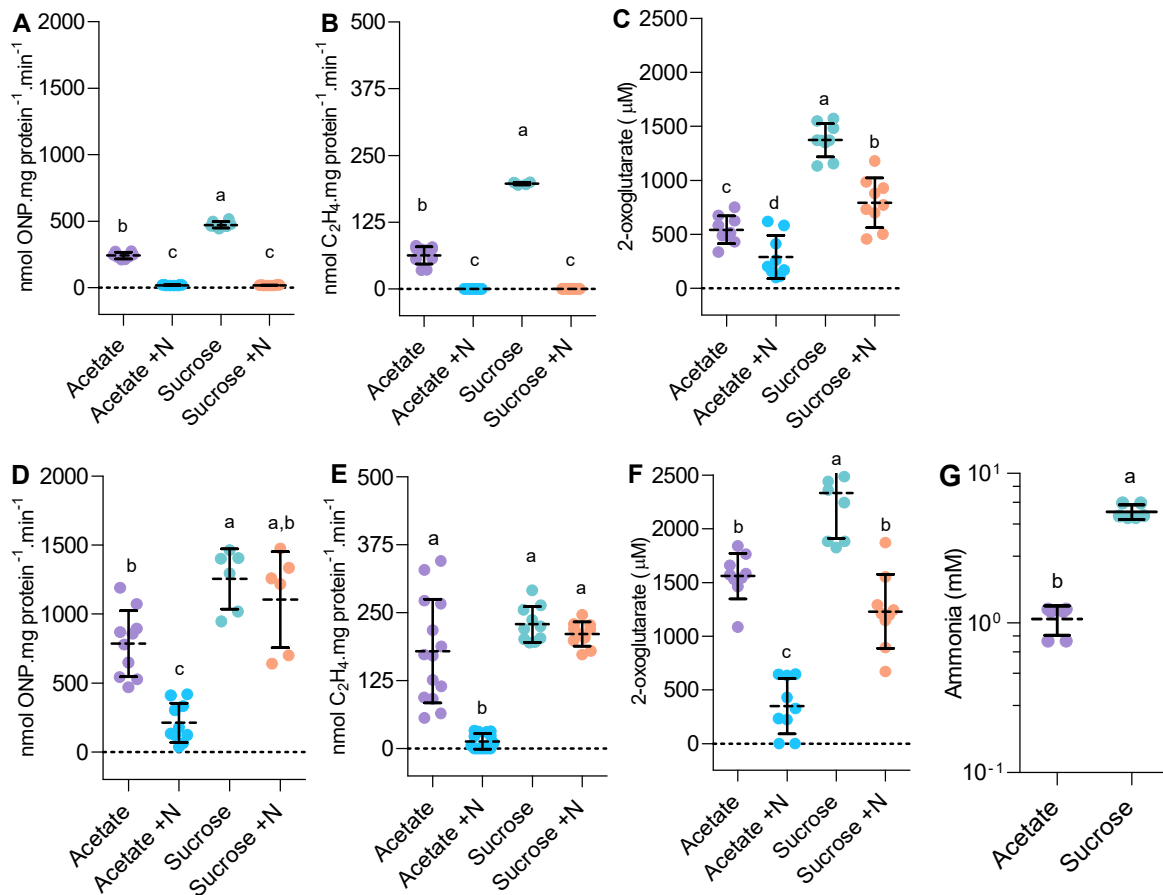

**Fig. 3 – Carbon status regulation of nitrogenase expression and ammonia excretion in *A. vinelandii*.** (A) Nitrogenase expression reported from a *nifH::lacZ* fusion, (B) nitrogenase activity and (C) internal 2-oxoglutarate levels are compared in the wild type (DJ) in acetate and sucrose in the absence (-N) or presence (+N) of 20 mM ammonium chloride. (D-F) The same comparisons as in (A-C) were done for the *nifA-E356K* strain (EK). For experiments in (A-F), strains were cultured to an O.D<sub>600nm</sub> between 0.2-0.3 in 30 mM acetate or 60 mM sucrose. To facilitate direct comparison of nitrogenase expression and activity, strain DJHZ was used in panels (A-B) whereas strain EKHZ was used in panels (D-E). These strains are isogenic to DJ and EK, respectively, except that they encode a *nifH::lacZ* fusion in the *algU* locus, a neutral site in the *A. vinelandii* genome (see Supplementary Material and Table S1). (G) Ammonia levels detected in the *nifA-E356K* (EK) strain when grown in either acetate or sucrose until cultures reached stationary phase. Plots followed by different letters are statistically different according to ANOVA with post-hoc Tukey's HSD or a paired t-test in (G).

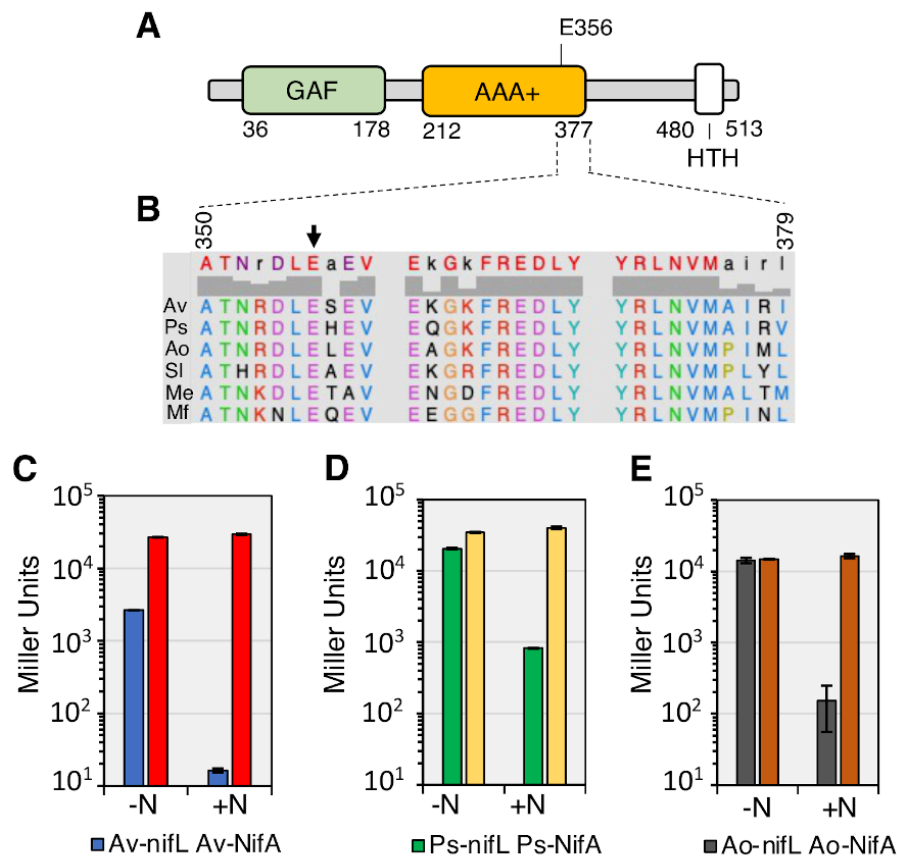

**Fig. 4 - Reciprocal amino acid changes (related to *nifAE356K* in *A. vinelandii*) yield constitutively active NifA in Proteobacteria.** (A) Diagram of the *A. vinelandii* NifA domains. (B) Alignment of residues close to E356 (black arrow) in the central AAA+ domain of NifA proteins. Sequence numbers refer to *A. vinelandii* NifA. Sequences used in the alignment are Av: *A. vinelandii* DJ, Ps: *Pseudomonas stutzeri* A1501 (Gammaproteobacteria), Ao: *Azoarcus olearius* DQS4, Sl: *Sideroxydans lithotrophicus* ES-1 (Betaproteobacteria), Me: *Marteella endophytica* YC6887 (Alphaproteobacteria) and Mf: *Mariprofundus ferrooxydans* M34 (Zetaproteobacteria). Panels C to E show  $\beta$ -galactosidase activities in the *E. coli* ET8000 chassis resulting from activation of a *nifH::lacZ* fusion (plasmid pRT22) by wild type and variant NifL-NifA systems from three different diazotrophs. Plasmids used to express NifL-NifA variants are as follows. (C) pPR34: Av-NifL-NifA, pPMA: Av-NifL-NifA-E356K; (D) pMB1804: Ps-NifL-NifA, pMB1805: Ps-NifL-NifA-E356K; (E) pMB1806: Ao-NifL-NifA, pMB1807: Ao-NifL-NifA-E351K. The assays were performed in NFDM media supplemented with 2% glucose in either nitrogen-limiting (200  $\mu$ g/ml of casein hydrolysate, -N) or nitrogen excess (7.56 mM ammonium sulphate, +N) conditions.

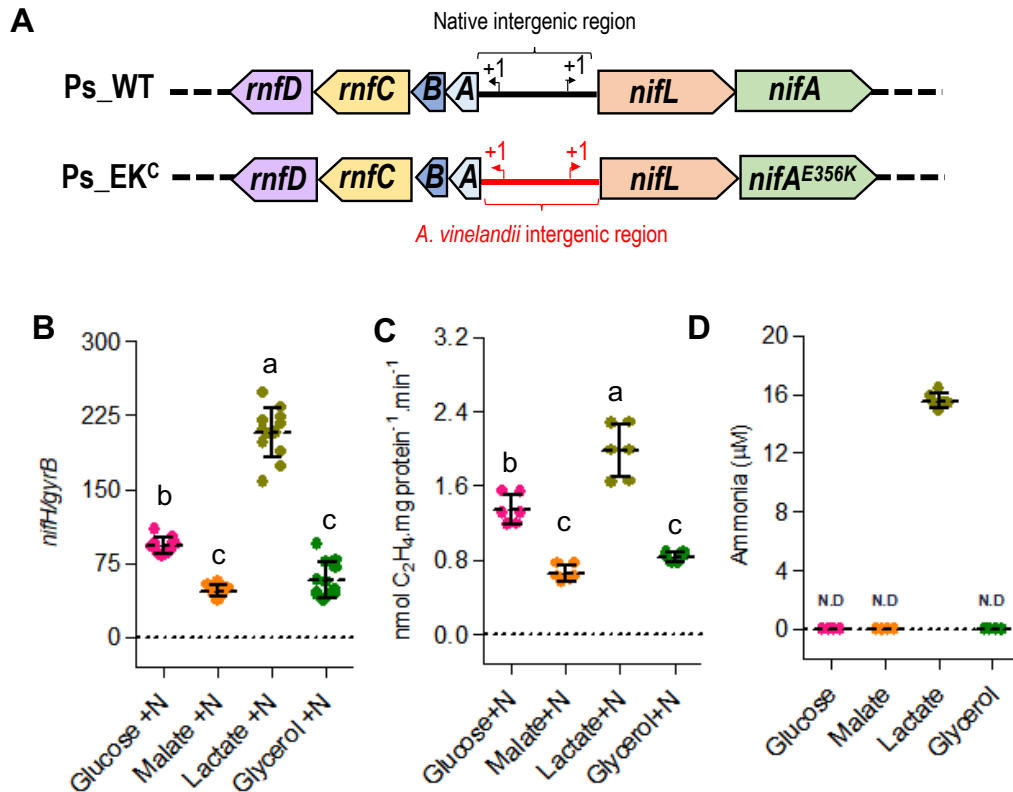

**Fig. 5 – The Ps-NifA-E356K protein is able to escape NifL inhibition in *P. stutzeri* leading to carbon-dependent ammonia excretion.** (A) Diagram depicting the modifications in the *P. stutzeri* *nifA*-E356K strain (Ps\_EK<sup>c</sup>) compared to wild type *P. stutzeri* (Ps\_WT). Drawings are not to scale. (B) Levels of *nifH* transcripts in the *P. stutzeri* Ps\_EK<sup>c</sup> strain in the presence of 5 mM NH<sub>4</sub>Cl (+N). (C) Nitrogenase activity in the *P. stutzeri* strain (Ps\_EK<sup>c</sup>) in the presence of 5 mM NH<sub>4</sub>Cl (+N). (D) Comparison of ammonia excretion profiles in different carbon sources. In all cases, the Ps\_EK<sup>c</sup> strain was grown in UMS-PS supplemented with 30 mM glucose, 45 mM malate, 60 mM lactate or 60 mM glycerol (to provide balanced carbon equivalents). N.D: not detected. Plots followed by different letters are statistically different according to ANOVA with post-hoc Tukey's HSD.

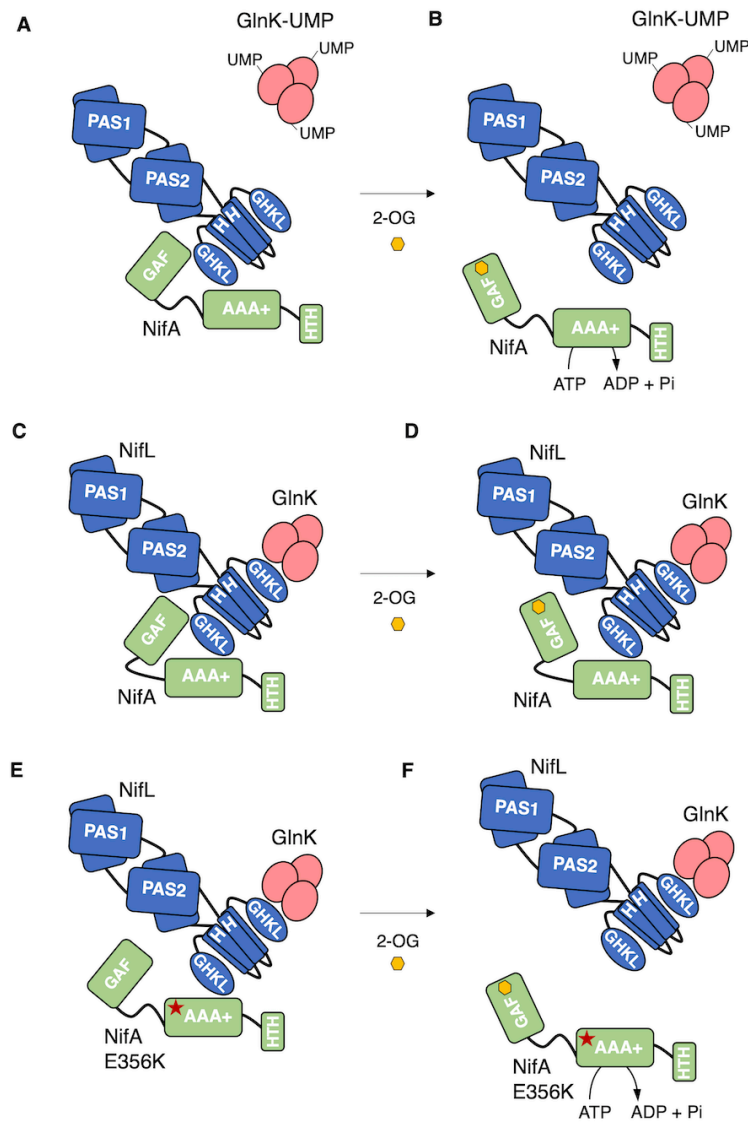

**Fig. 6. Model for 2-oxoglutarate regulation of NifA activity based on genetic and biochemical experiments.** (A) When 2-oxoglutarate levels are low, NifL can inhibit NifA even under nitrogen limiting conditions when GlnK is uridylylated (GlnK-Uridylylated) and unable to interact with NifL. (B) Binding of 2-oxoglutarate (2-OG, yellow hexagon) to the GAF domain of NifA, disrupts the binary NifL-NifA interaction activating NifA. (C) Under nitrogen excess conditions, non-covalently modified GlnK, interacts with the GHKL domain of NifL, stimulating the formation of a ternary complex between GlnK, NifL and NifA that inhibits NifA activity. (D) The GlnK-NifL-NifA ternary complex is stable even if the GAF domain in NifA is saturated with 2-OG. (E) The E356K substitution in the AAA+ domain of NifA (red star), perturbs the interaction with NifL in the absence of the non-modified form of GlnK. However, under nitrogen excess conditions, the GlnK-NifL-NifA-E356K ternary complex is formed when 2-OG is limiting. (F) When 2-OG levels are sufficient, conformational changes triggered by 2-OG binding to the GAF domain disrupt the ternary complex, activating NifA-E356K. Physiologically, interactions depicted in (E), may arise upon growth *in vivo* under carbon limiting conditions. A switch to a preferred carbon source, will lead to an increase in 2-OG, triggering the conformation change that allows NifA-E356K to escape from GlnK-NifL inhibition (F).
